# Supplementary material for: The effect of Cu dopants on electron transfer to O2 and the connection with acetone photocatalytic oxidations over nano-TiO2
Source: Royal Society of Chemistry journal article supplement (doi:10.1039/d1cp00118c), 2021-01-01
Supplement: d1cp00118c1.pdf [file d1cp00118c1.pdf]

# Effect of the Cu dopants on the Electron Transfer to O<sub>2</sub> and the Connection with the Photocatalysis over Nano-TiO<sub>2</sub>

Baoshun Liu, <sup>1\*</sup>Jiangyan Wang, <sup>1</sup>Ivan P. Parkin, <sup>2</sup>Xiujian Zhao<sup>1</sup>

<sup>1</sup> State Key Laboratory of Silicate Materials for Architectures, Wuhan University of Technology, Wuhan City, Hubei province 430070, P. R. China

<sup>2</sup> Department of Chemistry, Materials Chemistry Centre, University College London, 20 Gordon Street, London WC1H 0AJ, U.K.

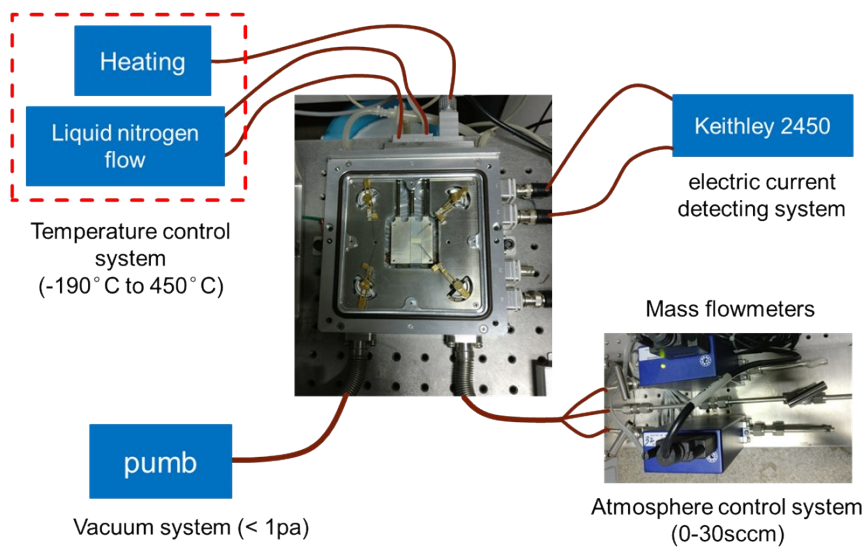

Fig. S1 Experimental setup for photoconductance and transient photoconductance measurement

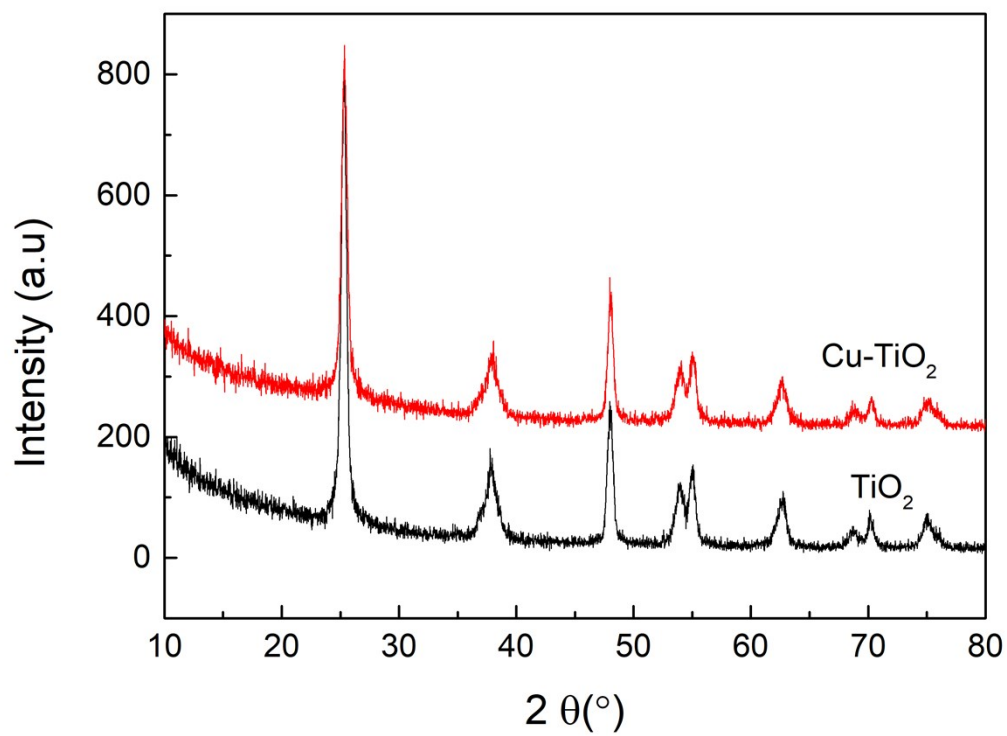

Fig. S2 XRD patterns of the undoped and Cu-doped  $\text{TiO}_2$  samples.

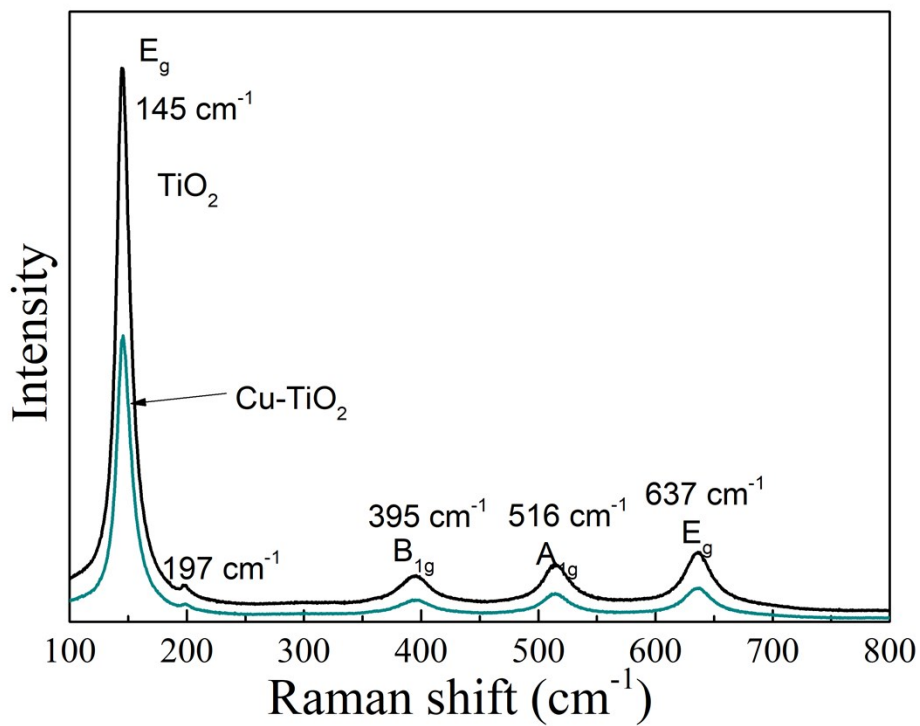

Fig. S3 Raman scattering patterns of the undoped and Cu-doped  $\text{TiO}_2$  samples, and the magnification of  $E_g$  peak at  $145 \text{ cm}^{-1}$  is shown in right-top corner.

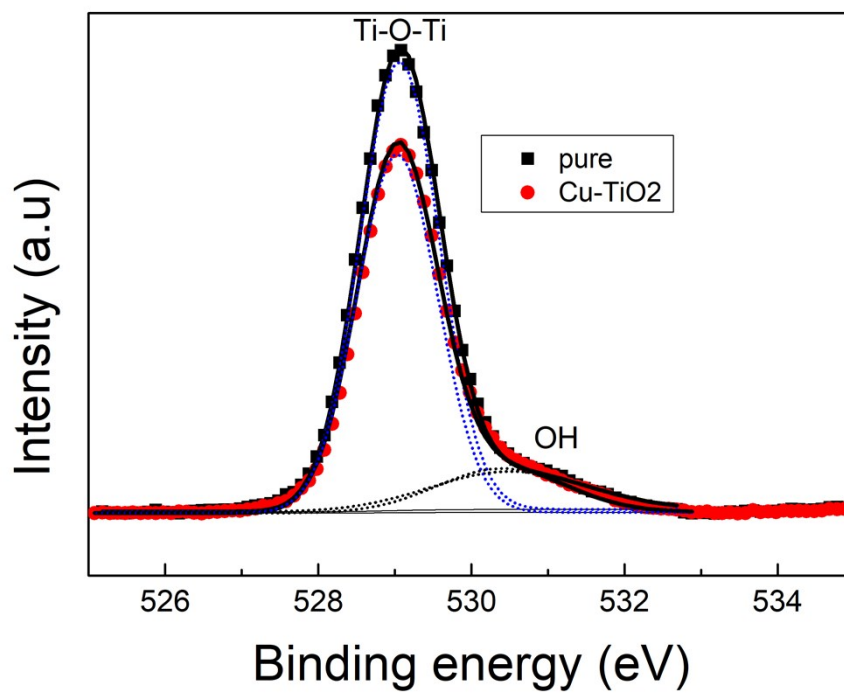

Fig. S4 O1s core-level XPS spectra of the pure and 0.2 Cu-TiO<sub>2</sub>

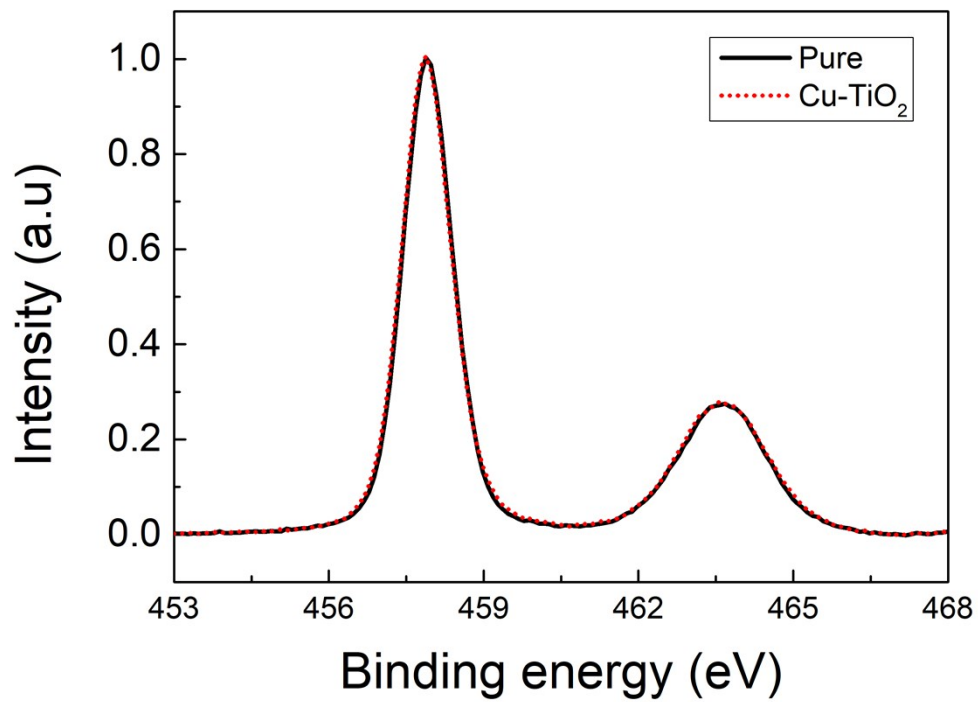

Fig. S5 Ti2p core-level XPS spectra of the pure and 0.2Cu-TiO<sub>2</sub>

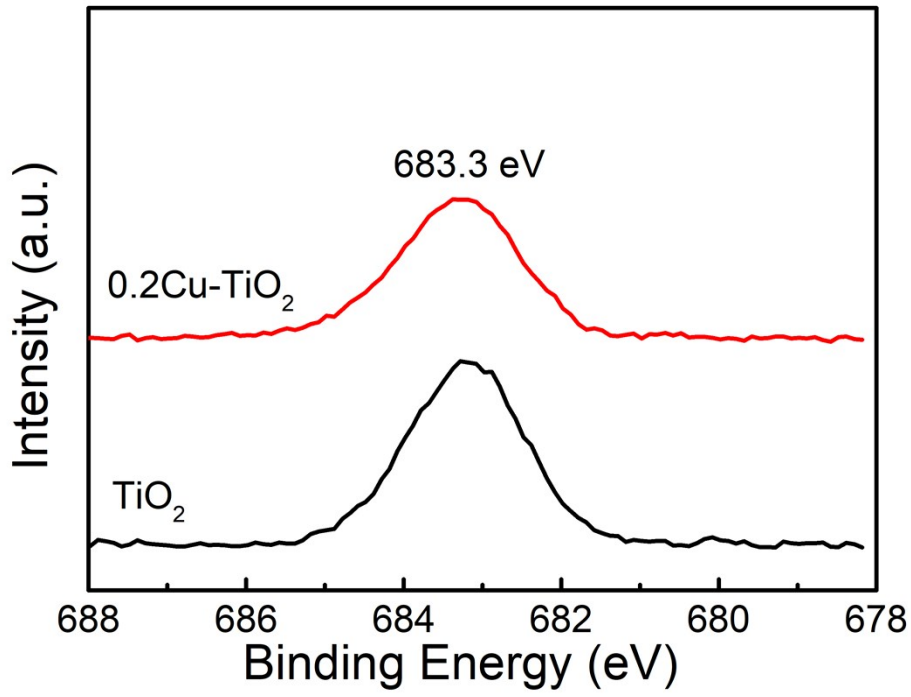

Fig. S6 F1s high-resolution core-level XPS spectra of the pure and 0.2Cu-TiO<sub>2</sub>

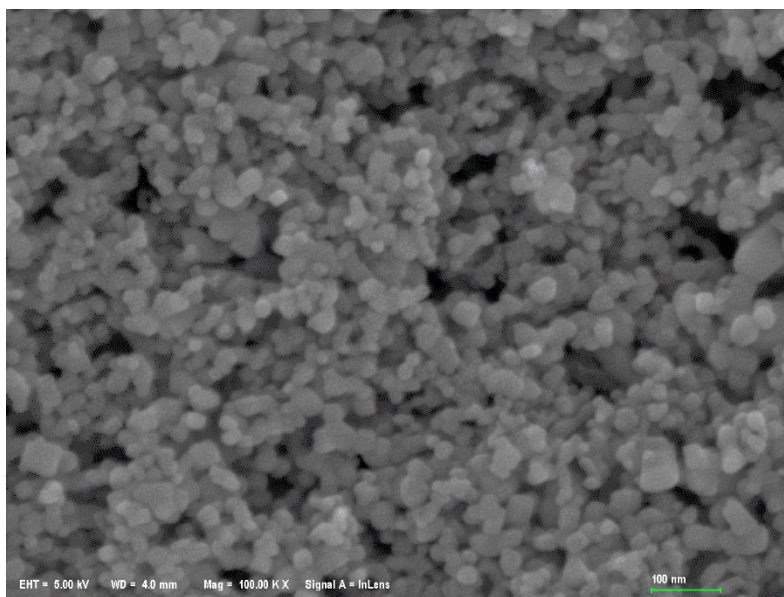

Fig. S7 SEM image of the undoped TiO<sub>2</sub> sample



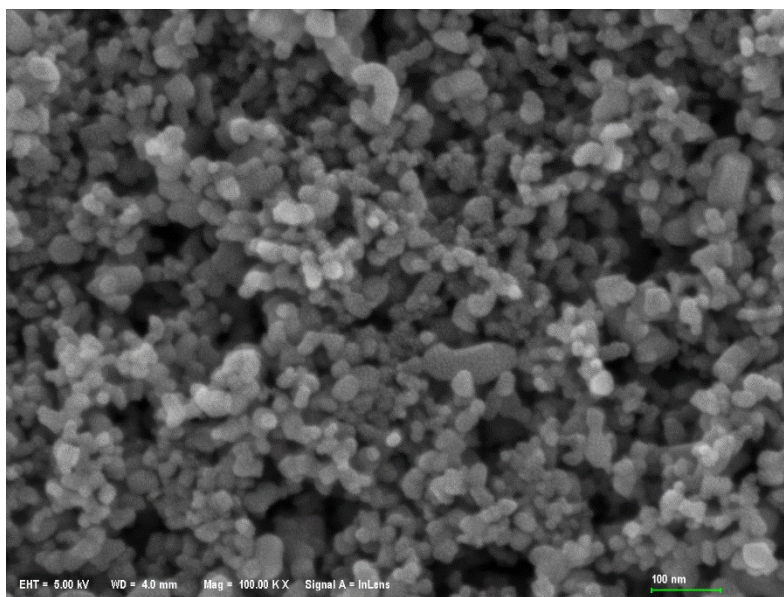

Fig. S8 SEM image of the Cu-doped TiO<sub>2</sub> sample

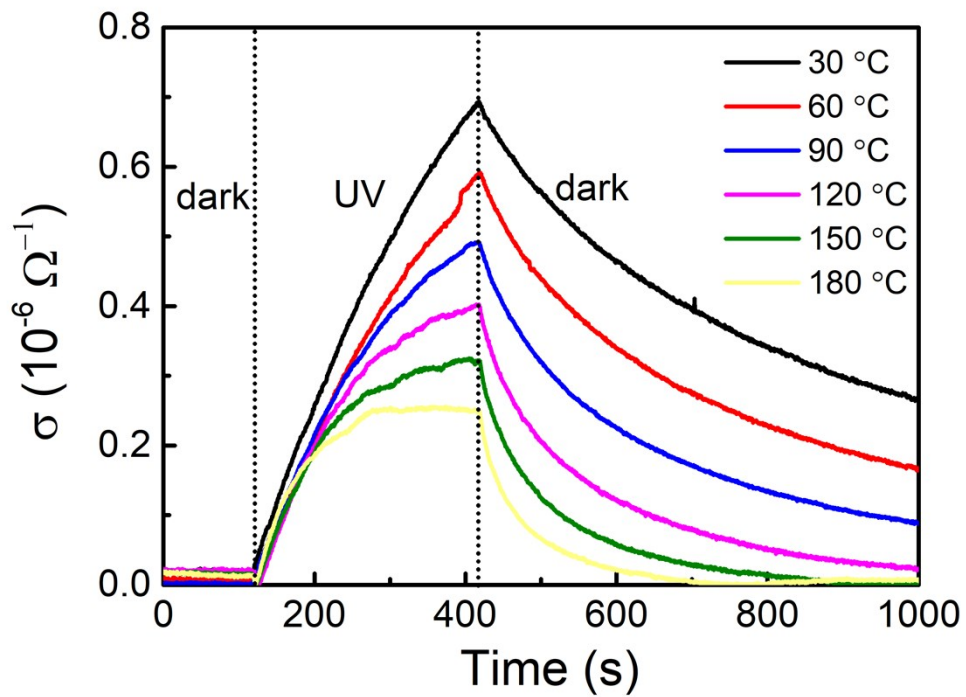

Fig. S9 Vacuum photoconductances of the undoped TiO<sub>2</sub> measured at different temperatures and at 1.0 Pa O<sub>2</sub> partial pressure under 20 mW/cm<sup>2</sup> 365 nm UV light illumination.

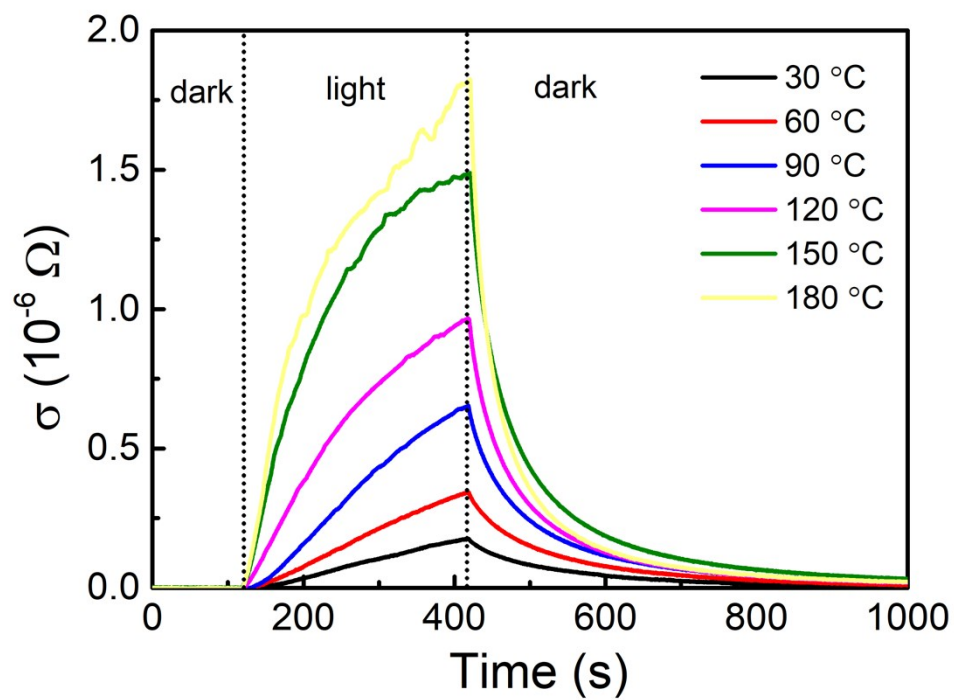

**Fig. S10** Vacuum photoconductances of 0.2Cu-TiO<sub>2</sub> measured at different temperatures and at 1.0 Pa O<sub>2</sub> partial pressure under 20 mW/cm<sup>2</sup> 365 nm UV light illumination

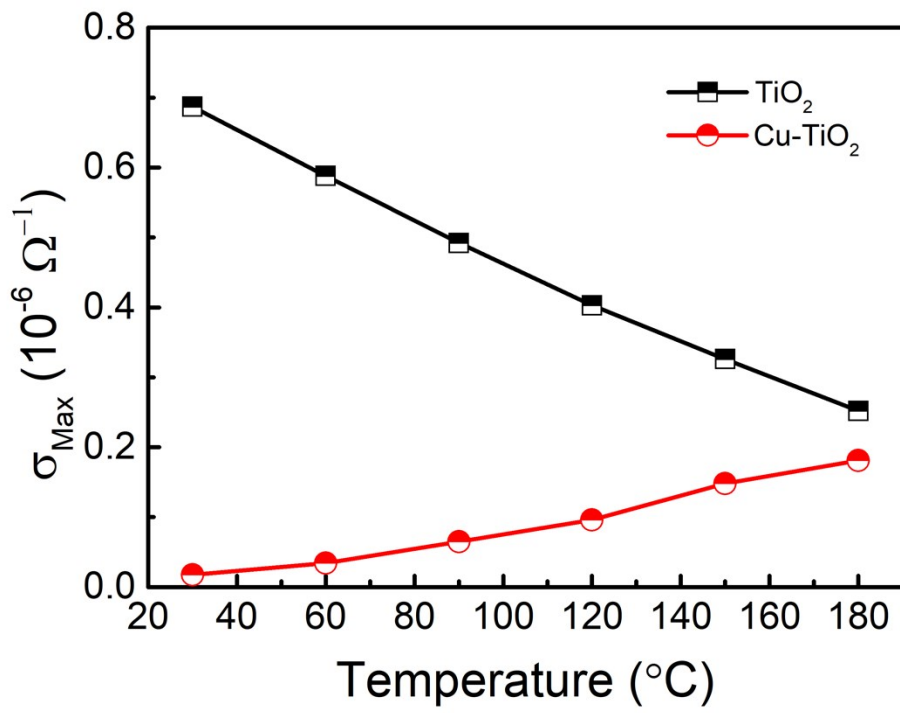

Fig. S11 Relation between the maxima of photoconductances and temperatures for the undoped  $\text{TiO}_2$  and 0.2  $\text{Cu-TiO}_2$ .

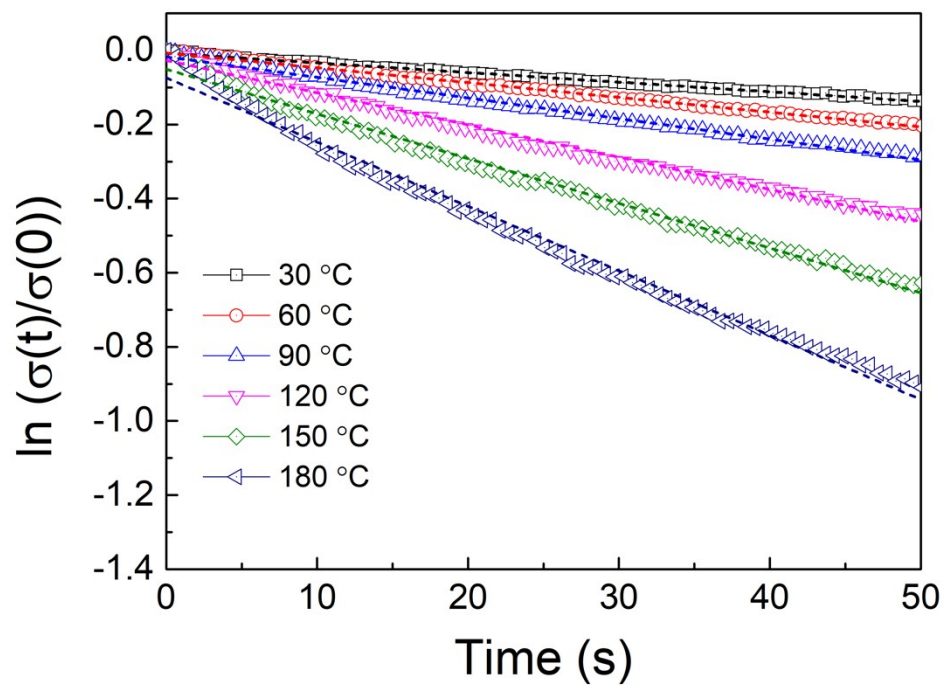

**Fig.S12** Dependences of  $\ln(\sigma(t)/\sigma(0))$  on time for the undoped sample at different temperatures

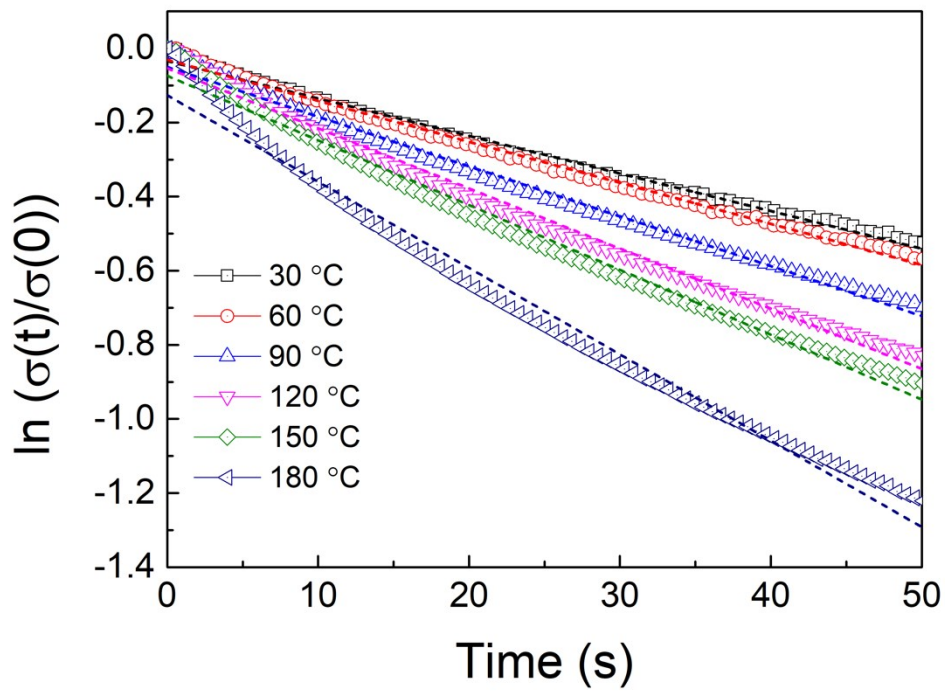

Fig. S13 Dependences of  $\ln(\sigma(t)/\sigma(0))$  on time for the 0.2 Cu-TiO<sub>2</sub> at different temperatures;

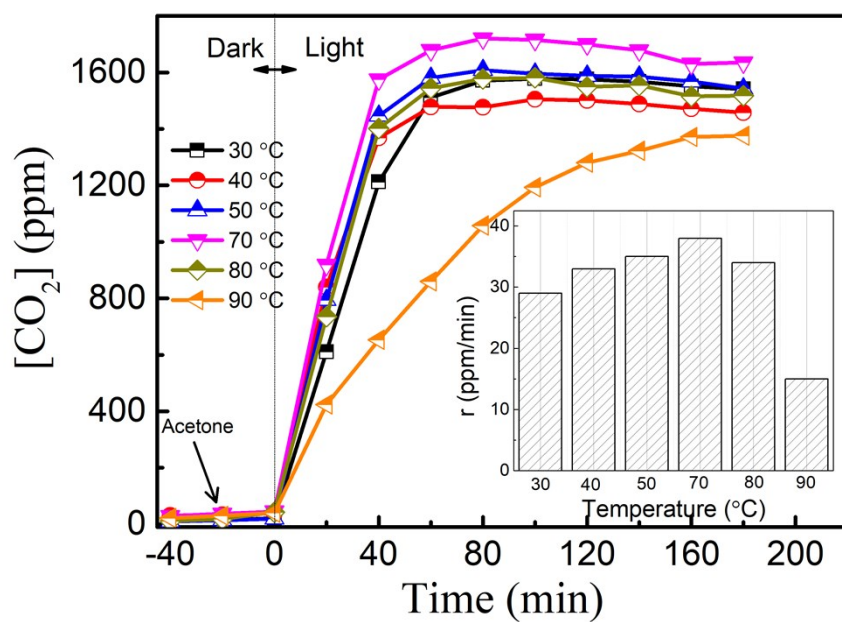

Fig. S14. CO<sub>2</sub> evolution during the acetone photocatalytic oxidations over the pure TiO<sub>2</sub> at different temperatures under 20 mW/cm<sup>2</sup> 365 nm UV light illumination.

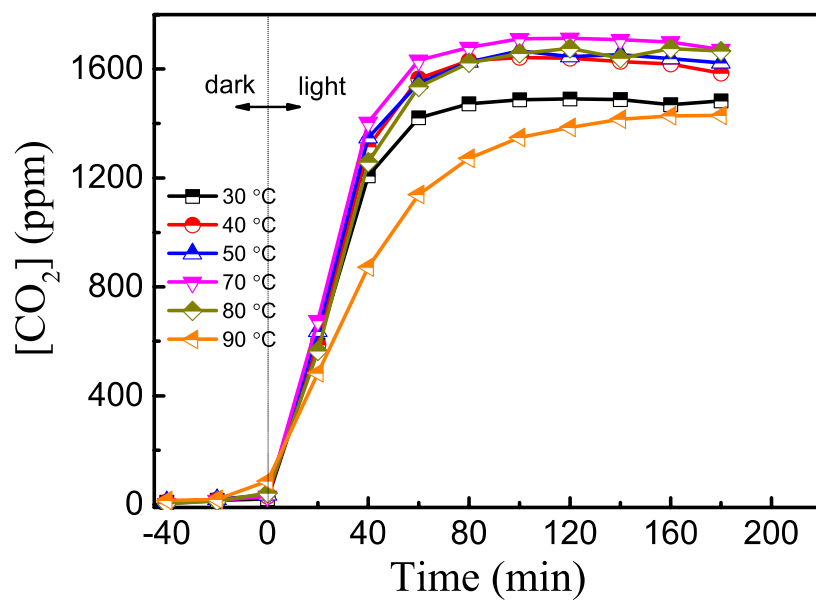

Fig. S15 CO<sub>2</sub> evolutions during the acetone photocatalytic oxidations over the undoped TiO<sub>2</sub> at different temperatures under 20 mW/cm<sup>2</sup> 365 nm UV light illumination



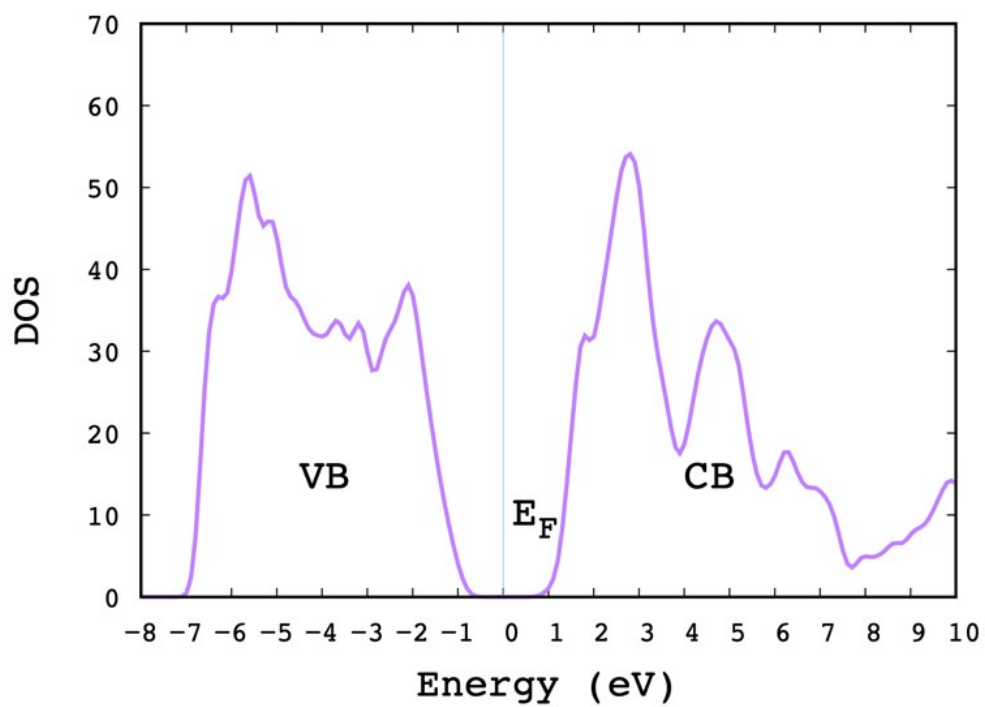

Fig. S16 DOS of the pure bulk TiO<sub>2</sub>

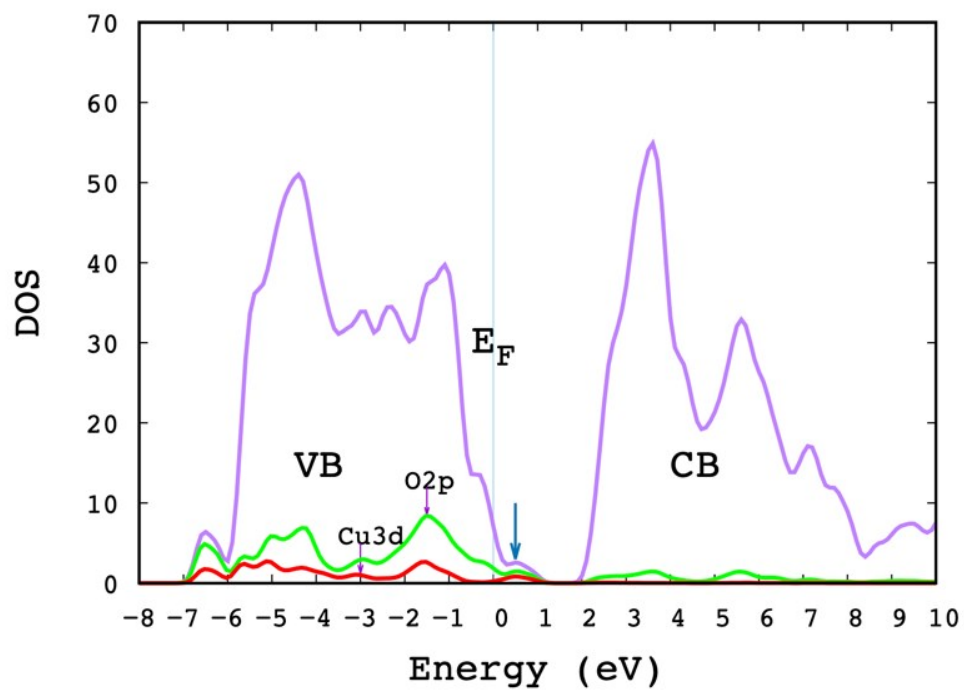

Fig. S17 DOS of the Cu doped bulk TiO<sub>2</sub>

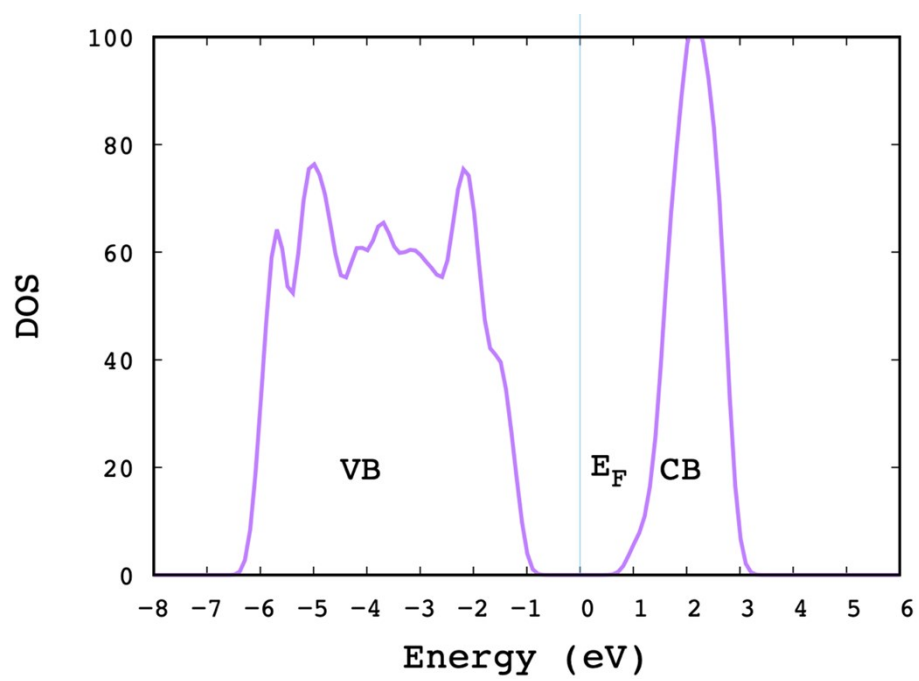

Fig. S18 DOS of the pure TiO<sub>2</sub> (101) surface

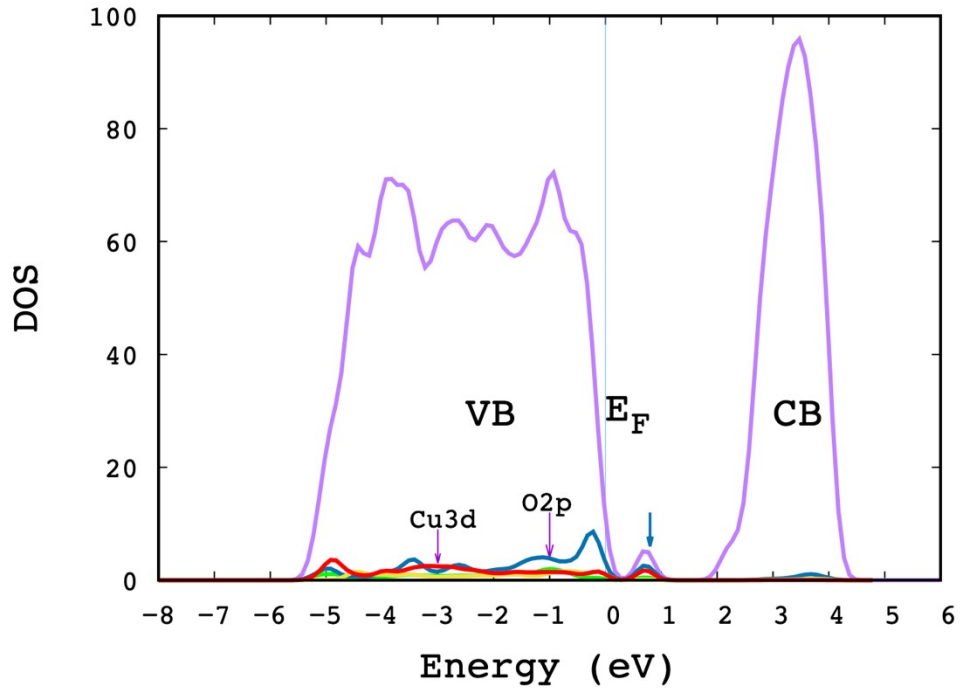

Fig. S19 DOS of and the Cu-doped TiO<sub>2</sub> (101) surface
